# Supplementary material
Source: Springer Nature journal article supplement (https://www.springermedizin.de/resource/supplementary/13063_2008_338_MOESM1_ESM.pdf/9618014)
Supplement: MOESM1 [file 9618014]

**Assessed for eligibility  
n=343**

|                                  |       |
|----------------------------------|-------|
| <b>Excluded n=281</b>            |       |
| Participating in other trial     | n=105 |
| Refused to participate           | n= 17 |
| Language problem                 | n= 7  |
| No show for admittance           | n= 10 |
| ASA IV                           | n= 22 |
| NYHA/CCS $\geq 3$                | n= 50 |
| Diabetes mellitus                | n= 57 |
| Impaired renal function          | n= 2  |
| Failed epidural attempt          | n= 8  |
| Logistical problem with material | n= 2  |
| Falsely seen as eligible         | n= 1  |

**Randomised  
n=62**

**Standard IV fluid infusion regime  
(2.5 l per 24 hrs)  
n=32**

**Restricted IV fluid infusion regime  
(1.5 l per 24 hrs)  
n=30**

**Unmasked n=7**  
- MAP < 50 mmHg n=2  
- Severe blood loss n=3  
- Infusion pump problems n=2

**Unmasked n=12**  
- MAP < 50 mmHg n=4  
- Oliguria n=2  
- Re-operation n=2  
- Severe blood loss n=1  
- Infusion pump problems n=2  
- Cardiovascular n=1

**Per protocol  
analysis  
n=25**

**Intention to treat  
analysis  
n=32**

**Intention to treat  
analysis  
n=30**

**Per protocol  
analysis  
n=18**
